# Supplementary material
Source: PubMed Central journal article supplement (PMC2681874)
Supplement: supp_47_5_1402__1.pdf [file supp_47_5_1402__1.pdf]

## Electronic Supplement

### Materials and Methods

#### ***In-silico reconstruction of archetype-like sequences from samples E4 and F1***

There were no archetype-like sequences among analyzed clones from the 5<sup>th</sup> urine sample from patient E. However for patient E, mrNCRR architecture for variant V15.1 consisted of a complete archetype-like sequence with a single insertion of segment P60 - Q19. Since the sequence of this repeat was identical to the segment it repeated, it was deleted *in silico* to artificially recreate the archetype-like sequence from which mrNCRR V15 was presumably derived. This *in silico* construct, “E\_2.1\_reconstruct”, mapped to lineage Ib-2 (Fig. 3).

Similarly, there were no archetype-like sequences among analyzed clones from the urine sample from patient F. However, none of the clones from patient F had a complete R segment. The most complete *in silico* archetype recreation for patient F, [P1-68, Q1-39, R20-42, R52-63, S1-63], was reconstructed *in silico* by first removing the P20-Q34 sequence insert from variant mrNCRR V4.1 (duplicated sequences were identical) and then extending the R segments from this isolate with slightly longer R segments from the other variants that had identical sequences in the portions of their R segments that overlapped with those in variant V4.1. This *in silico* reconstruct with gaps showed highest similarity to genogroup 1b-1 (not shown).

### Figure legends

#### **Electronic Supplement Fig. 1. BKV phylogenetic analysis based on complete BKV sequences from which NCRRs had been deleted *in silico*.**

The complete BKV viral sequences of all isolates analyzed in Zheng et al (1) and 3 sequences from Sharma et al were downloaded from the EMBL database. Isolates with non-archetype-like NCRR were excluded from further analysis. The remaining sequences were aligned with the Sequencher program and used to generate a data files of the complete sequence of each isolate minus its NCRR sequence (as in Zheng et al., (1)). Sequences in each data set were aligned, the data bootstrapped 1000 times, and a nearest-

neighbor phylogenetic tree constructed using ClustalX. The tree was visualized using njplot (large image) with WW sequence used as the reference outgroup. An unrooted trees was also visualized using the unrooted program (inserts at the bottom left of each panel). For visual clarity only the names of the genotypes and sub-genotypes appear for the unrooted tree. [Nomenclature convention: Isolates are designated by their genotype and subgenotype according to Zheng et al (1), the isolate name and then the EMBL access number]

**Electronic Supplement Fig. 2. BKV phylogenetic analysis based on the NCRRs that had been excised *in silico* from full length BKV genomic sequences analyzed for Electronic Supplement Fig.1.**

Non-archetype NCRR sequences were excised *in silico* from the complete BKV viral sequences of all isolates with archetype NCRRs analyzed in Electronic Supplement Fig. 1. The archetype NCRR sequences that remained were aligned with the Sequencher program and used to generate a data file that was aligned, bootstrapped 1000 times, and used to construct a nearest-neighbor phylogenetic tree with ClustalX. The tree was visualized using njplot (large image). The WW NCRR sequence was used as the reference outgroup. [Nomenclature convention as in Electronic Supplement Fig. 1]. An unrooted tree was also visualized using the unrooted program (inserts at the bottom left of each panel). For visual clarity only the names of the genotypes and sub-genotypes appear for the unrooted tree.

1. **Zheng, H. Y., Y. Nishimoto, Q. Chen, M. Hasegawa, S. Zhong, H. Ikegaya, N. Ohno, C. Sugimoto, T. Takasaka, T. Kitamura, and Y. Yogo. 2007.** Relationships between BK virus lineages and human populations. *Microbes Infect* **9**:204-13.

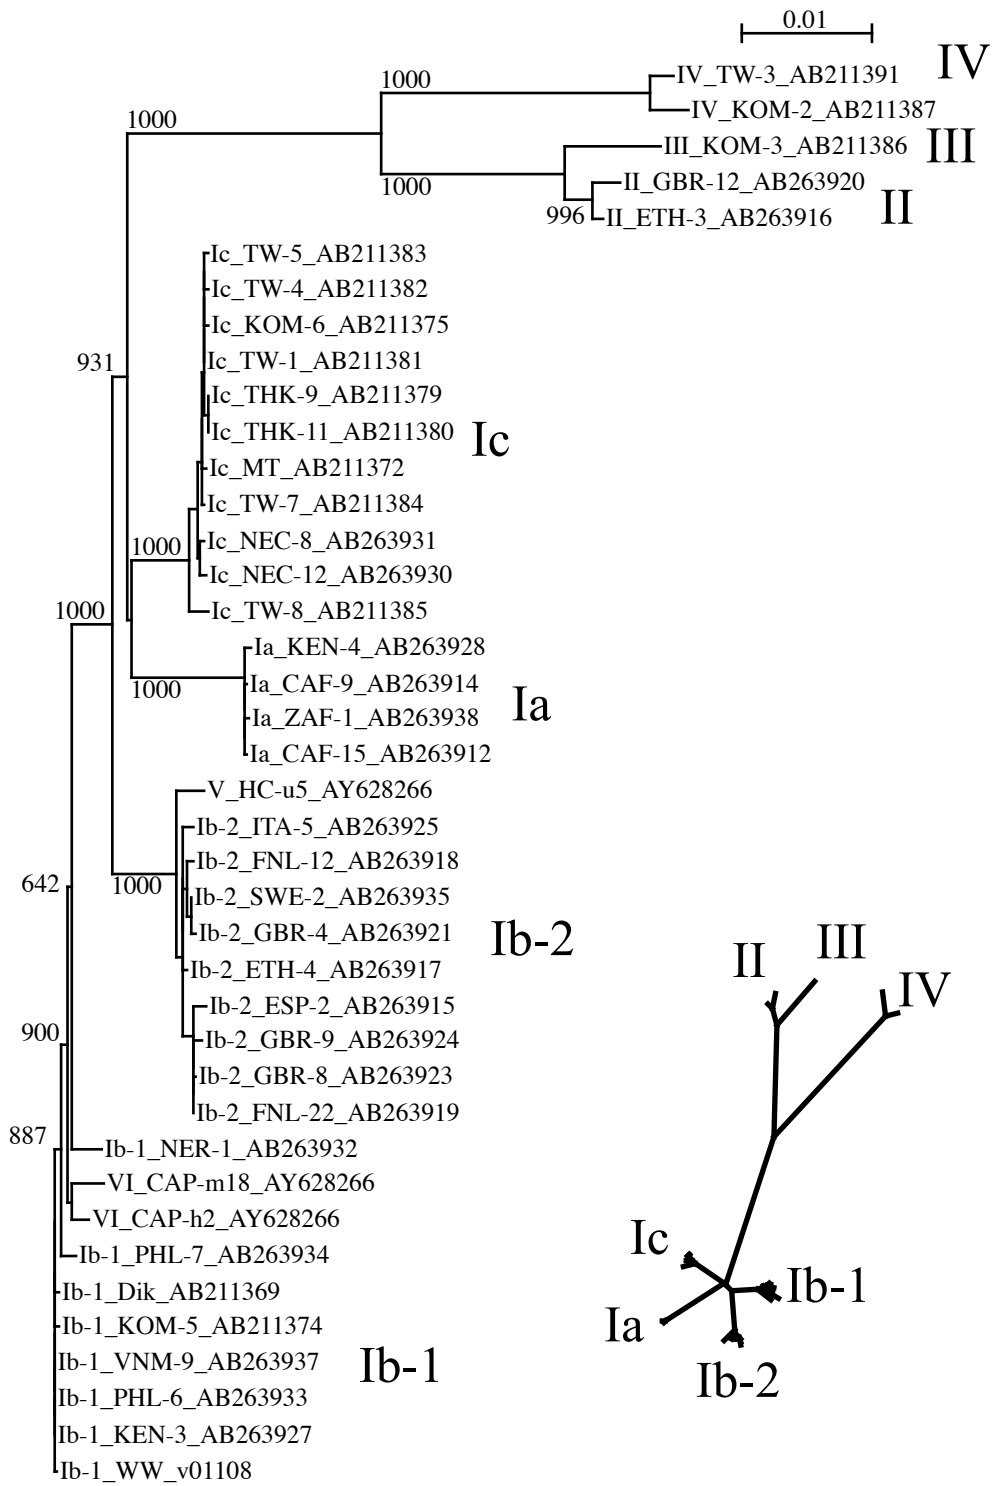

Fig. ES 1 PVAN

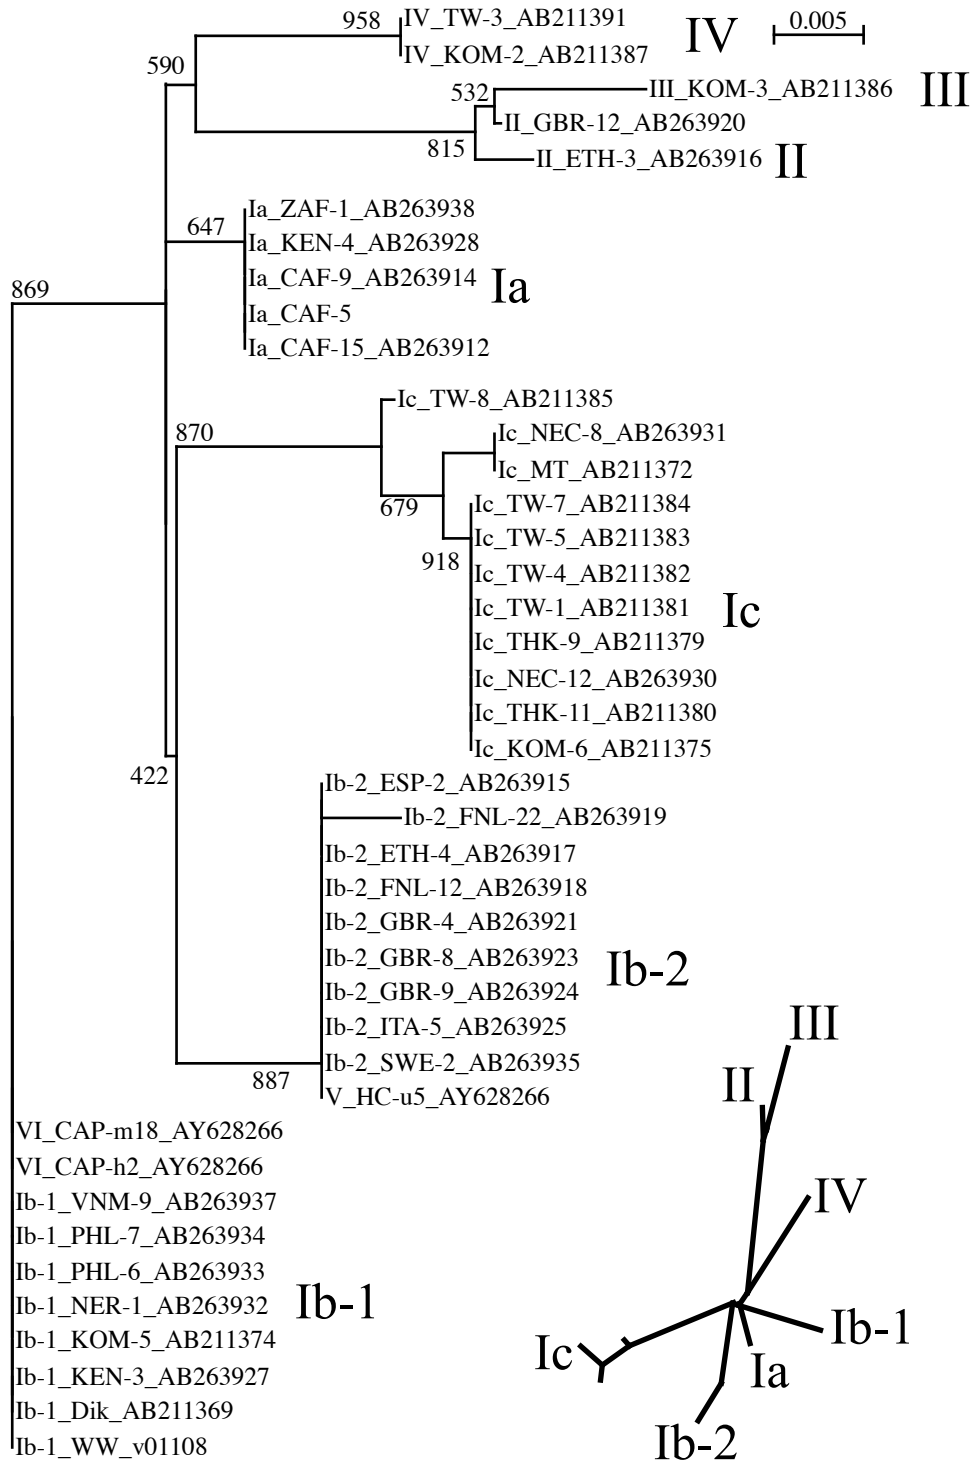

Fig. ES 2 PVAN
